# Supplementary material for: Temporally staggered cropping co-benefits beneficial insects and pest control globally
Source: Research Square preprint supplement (doi:10.21203/rs.3.rs-7655633/v1), 2025-10-06
Supplement: Supplementary file 1 [file 98d298493c0b2a9dc6c2cb66.pdf]

## **Supplementary Information**

### **Temporally staggered cropping co-benefits beneficial insects and pest control globally**

#### **This file includes:**

Figures S1 to S10

Table S1 to S2

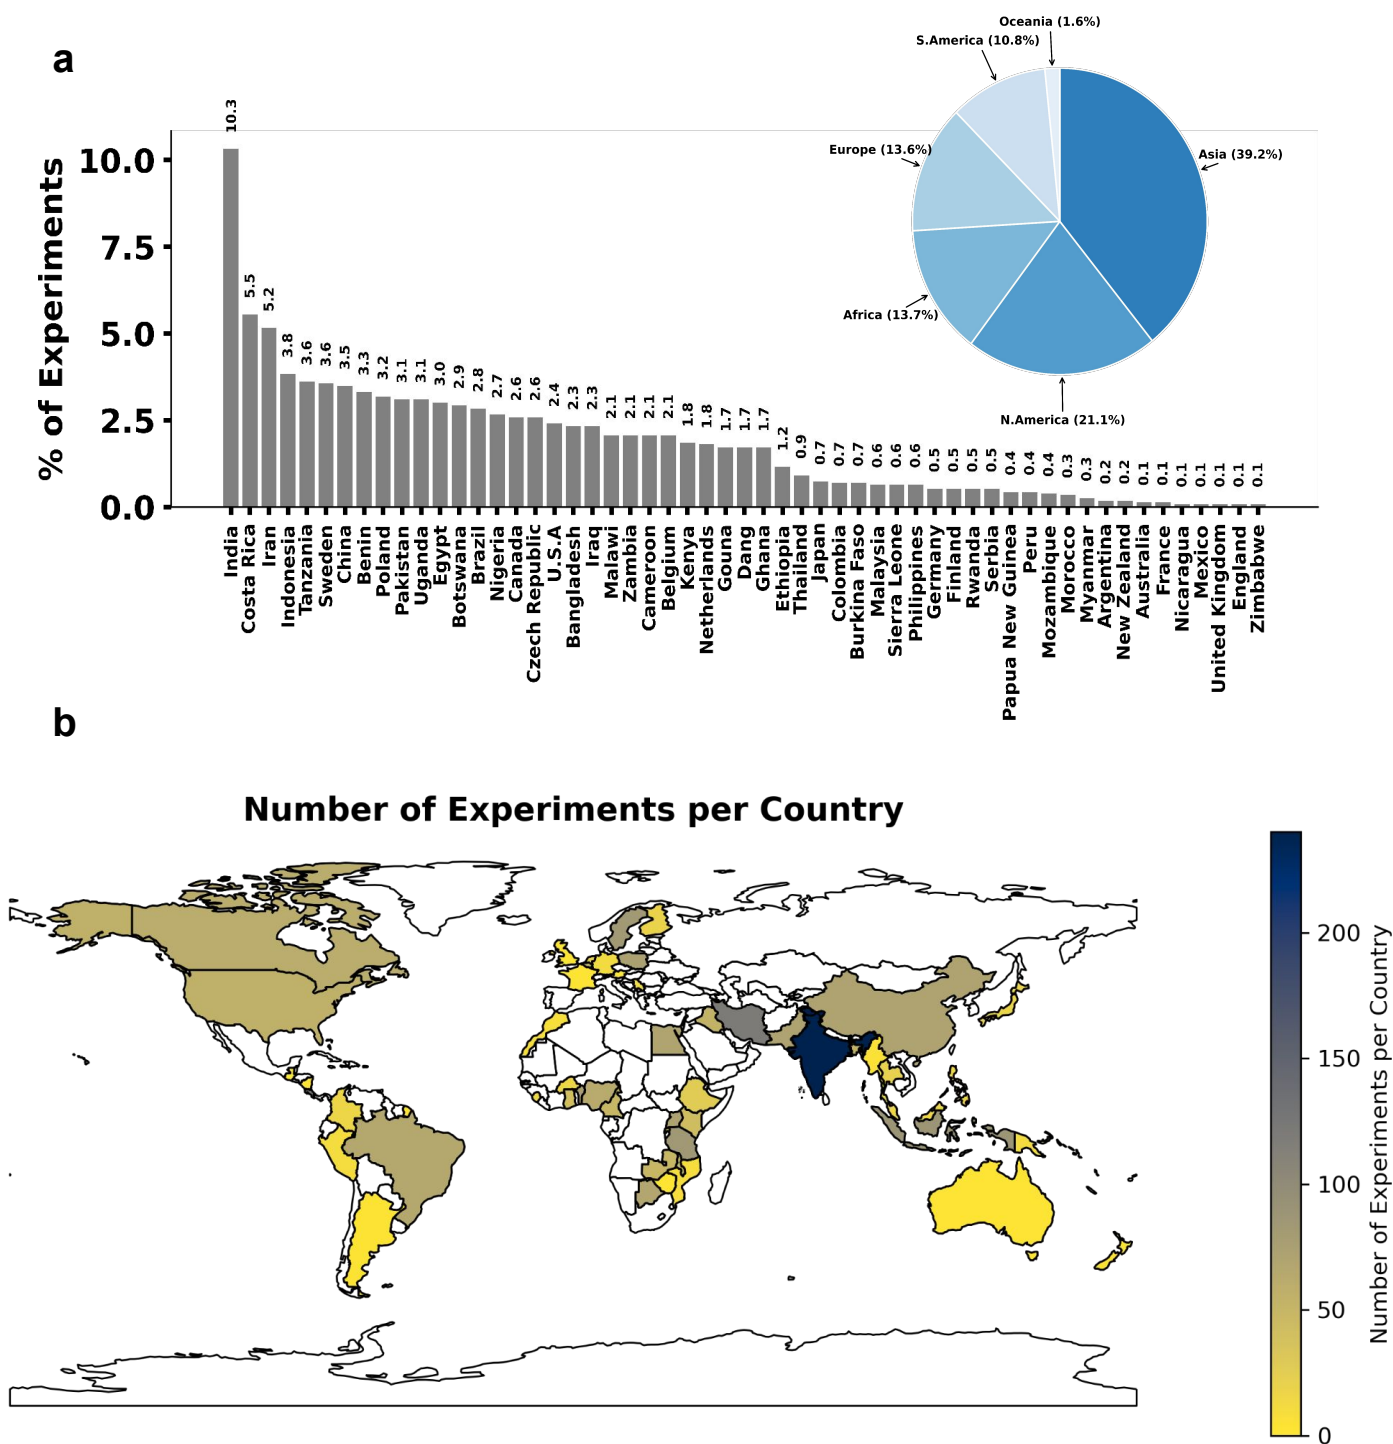

**Fig. S1| Geographical distribution of experiments included in the database. a,** Percentage of experiments by country and continent. **b,** Spatial distribution of number of experiments recorded in each country.

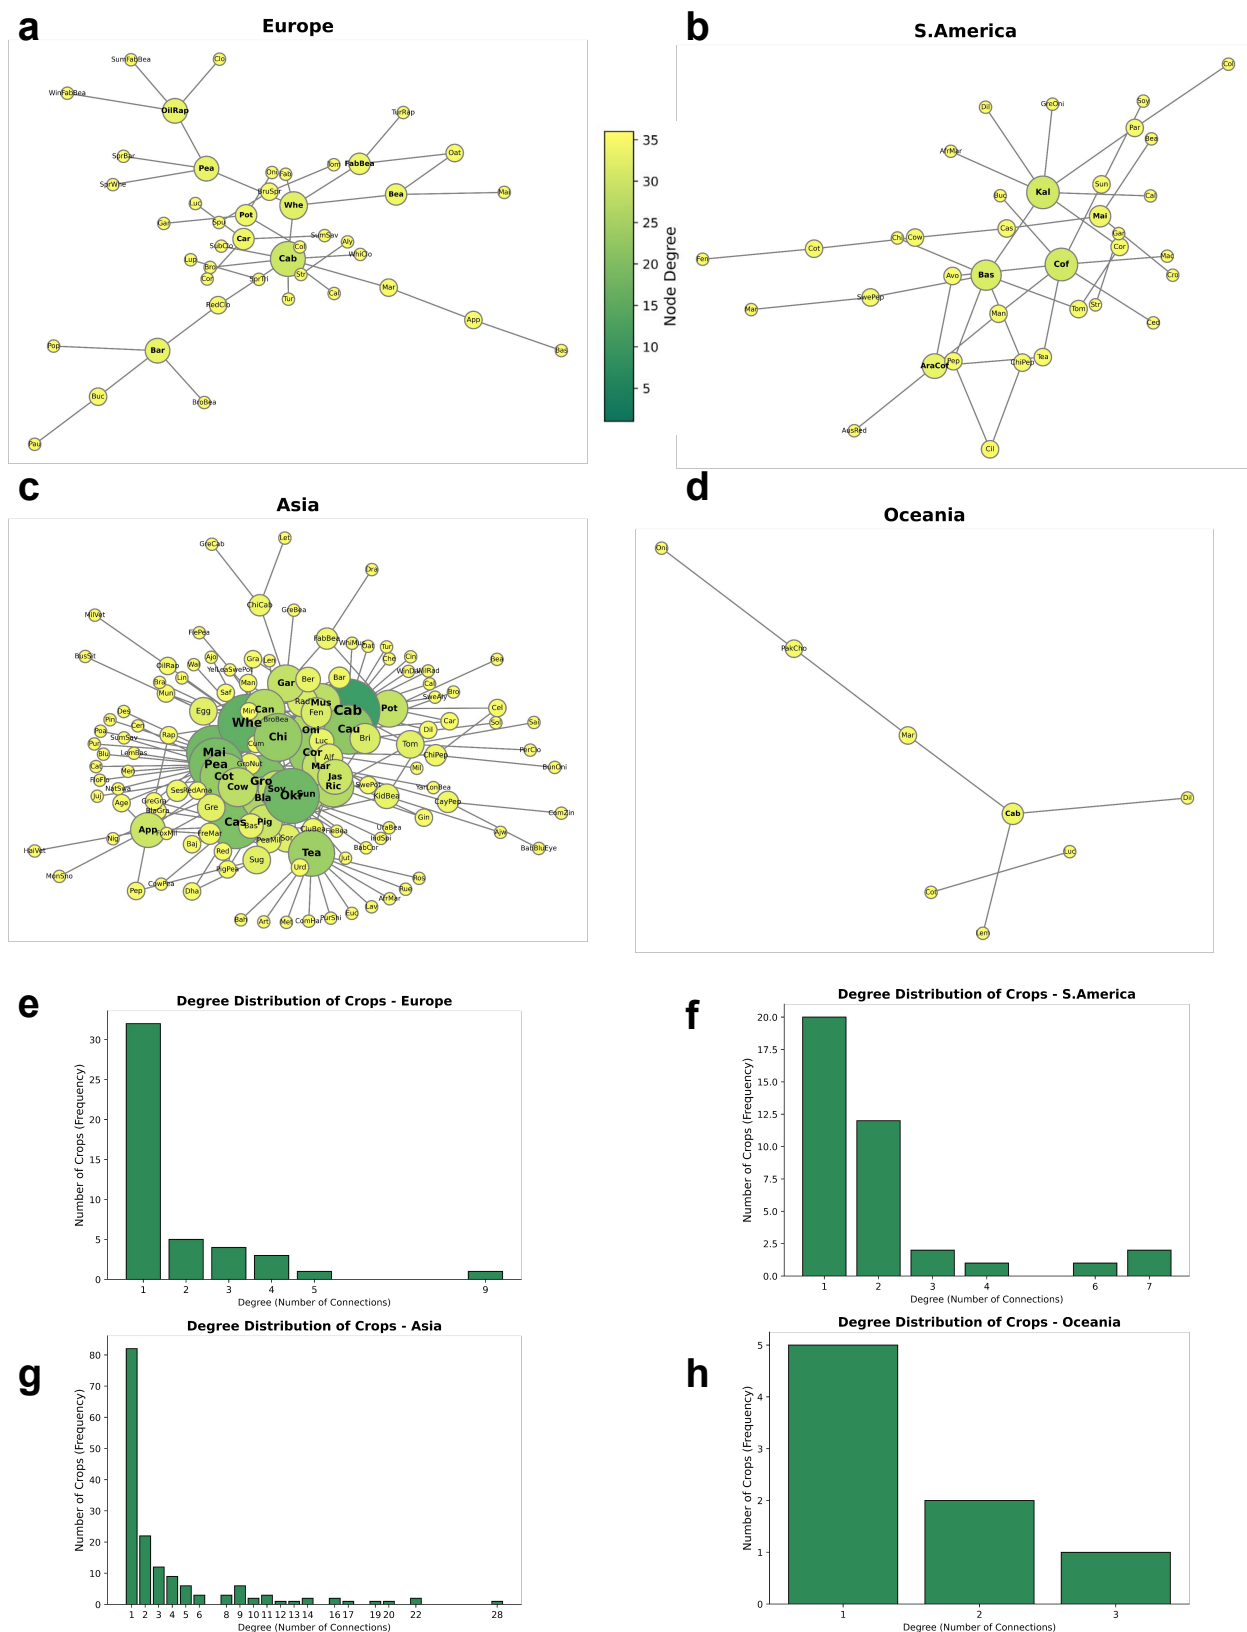

**Fig. S2| Patterns of crop interactions in agroecosystems.** Crop interaction networks for Europe (a), South America (b), Asia (c), and Oceania (d) with nodes representing crops and edges showing intercropping pairs. Node size and color correspond to the number of intercropping connections, highlighting the degree (connection) of each crop within the network. Bar plots show degree distribution of same continents (e-h).

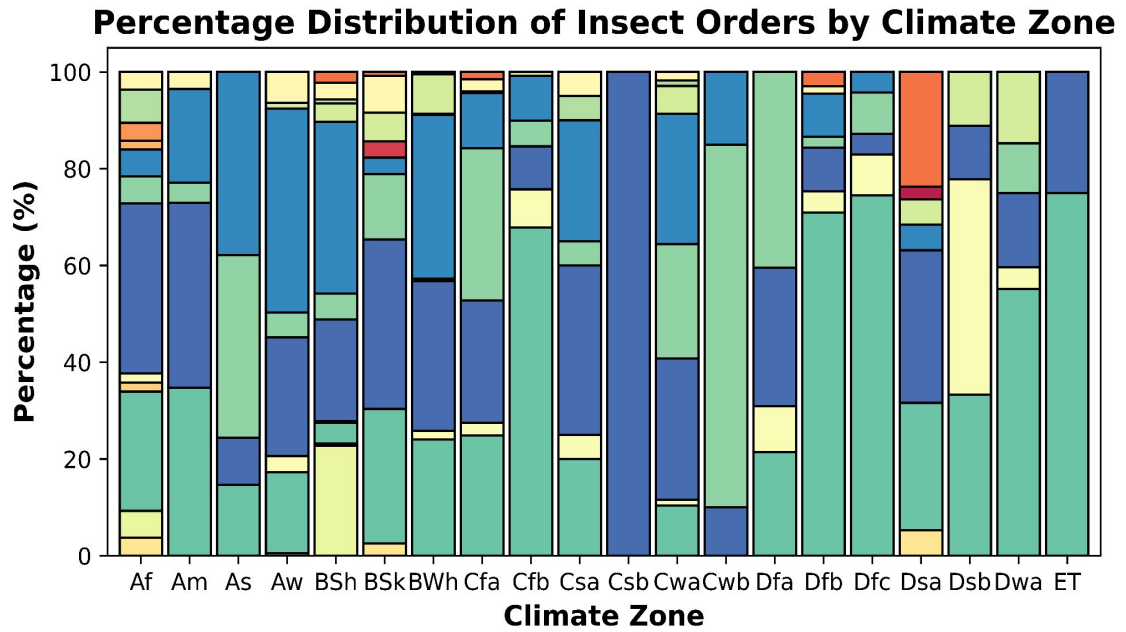

**Fig. S3|** Percent distribution of insect orders by Köppen-Geiger climate zones.

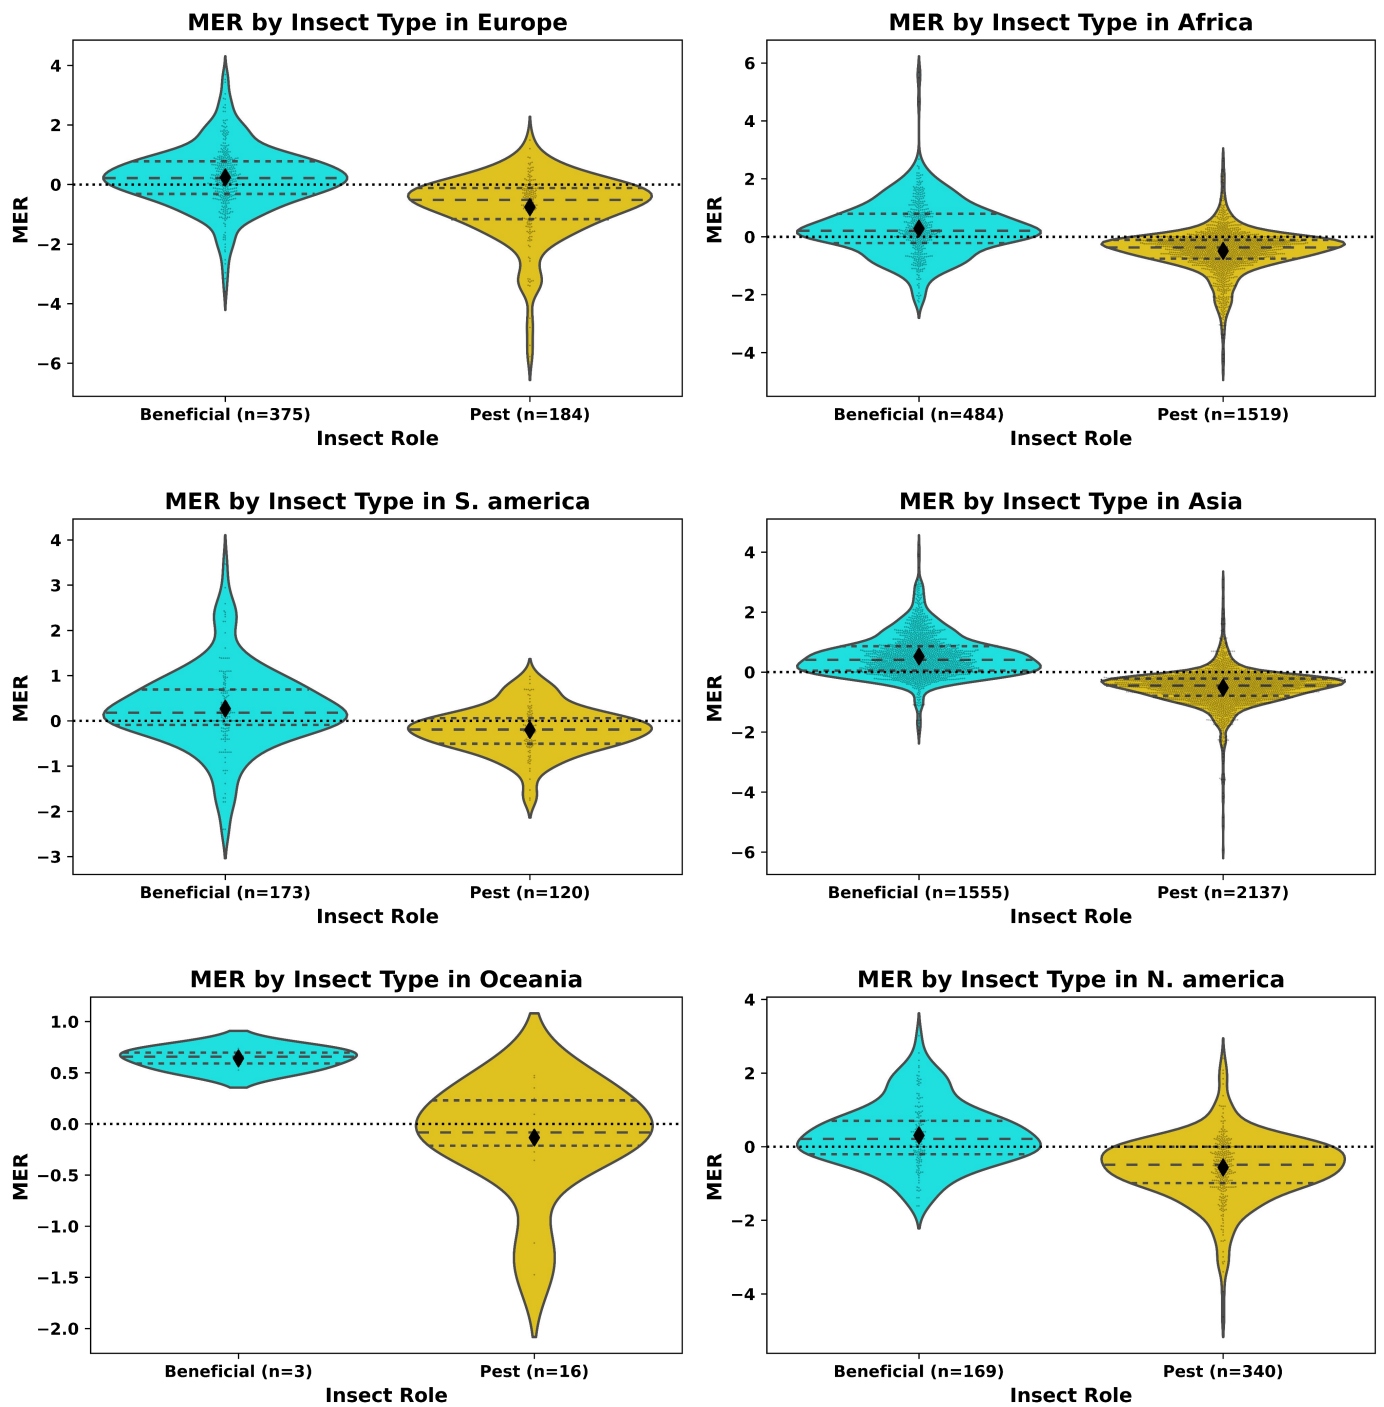

**Fig. S4| Effect of intercropping on beneficial insects and pests in different continents.** The total number of individual effect sizes is indicated by “n.” The diamond symbol illustrates the average effect size.

**a**

Dunn's Test (Bonferroni) with Cliff's Delta Effect Sizes

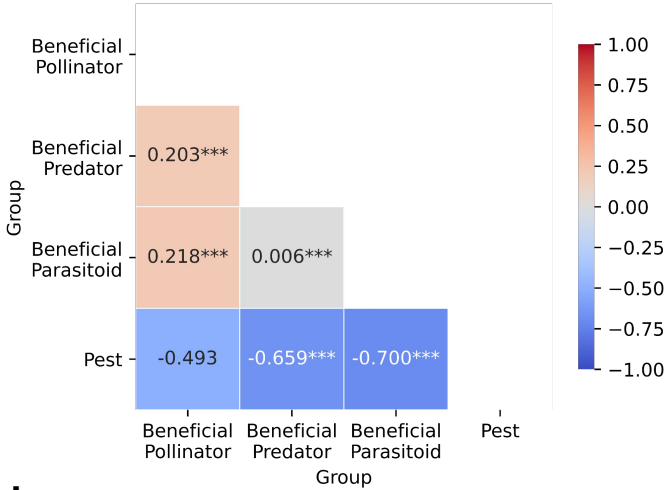

**Kruskal-Wallis Test Results:**

- Q statistic: 1995.064
- P-value <0.001
- There is significant heterogeneity among groups.

**Higgins & Thompson's I<sup>2</sup> Statistic:**

- I<sup>2</sup> = 99.85%
- High heterogeneity detected.

**b**

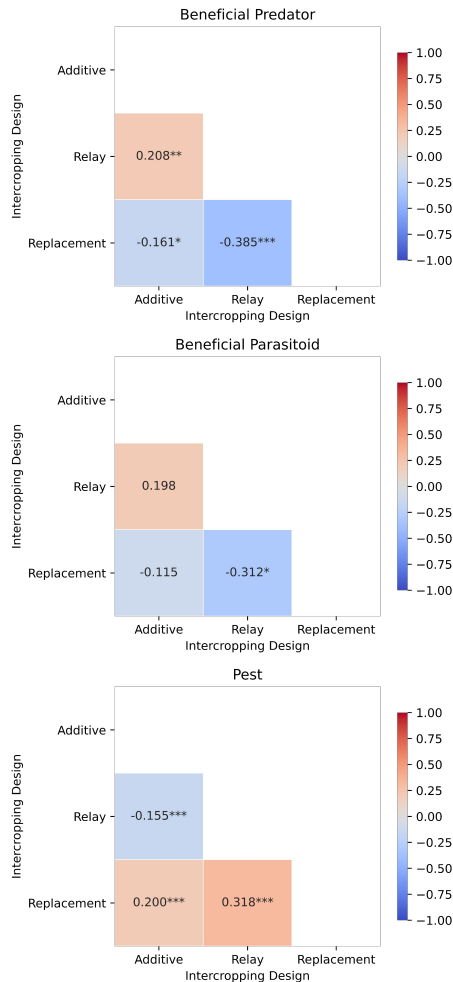

**Beneficial Pollinator:**

Only one Intercropping Design present.

**Beneficial Predator:**

Kruskal-Wallis test p-value: 8.7716e-04

Effect Size ( $\epsilon^2$ ) = 0.0080

LOO-CV Mean p-value: 8.8349e-04, Std Dev: 7.8786e-05

LOO-CV Mean Effect Size ( $\epsilon^2$ ): 0.0080, Std Dev: 0.0001

**Beneficial Parasitoid:**

Kruskal-Wallis test p-value: 7.0440e-02

Effect Size ( $\epsilon^2$ ) = 0.0114

LOO-CV Mean p-value: 7.1090e-02, Std Dev: 7.4237e-03

LOO-CV Mean Effect Size ( $\epsilon^2$ ): 0.0114, Std Dev: 0.0005

**Pest:**

Kruskal-Wallis test p-value: 3.0699e-06

Effect Size ( $\epsilon^2$ ) = 0.0063

LOO-CV Mean p-value: 3.0891e-06, Std Dev: 2.5951e-07

LOO-CV Mean Effect Size ( $\epsilon^2$ ): 0.0063, Std Dev: 0.0000

**Fig. S5| Statistical analysis of effect of intercropping. a**, Statistical analysis of effect of intercropping on pollinators, parasitoids, and predators. **b**, Effect of temporal intercropping arrangements on insect functional groups. Here ‘\*’ means 10% significance level, ‘\*\*’ means 5% significance level, ‘\*\*\*’ means 1% significance level.

**a**

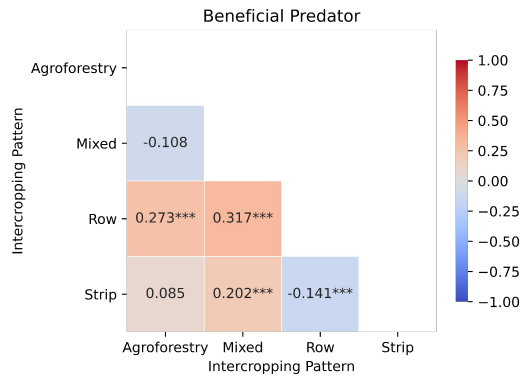

**Beneficial Pollinator:**

Kruskal-Wallis test p-value: 3.7302e-01

Effect Size ( $\epsilon^2$ ) = 0.0297

LOO-CV Mean p-value: 3.7630e-01, Std Dev: 4.9215e-02

LOO-CV Mean Effect Size ( $\epsilon^2$ ): 0.0300, Std Dev: 0.0036

**b**

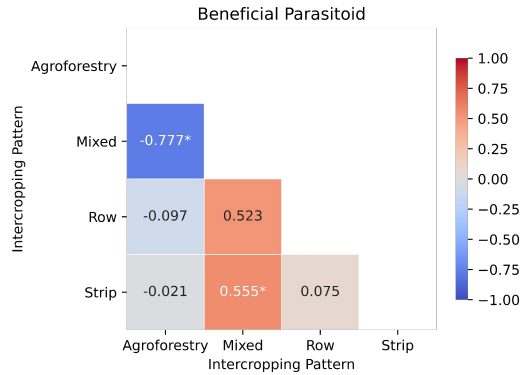

**Beneficial Predator:**

Kruskal-Wallis test p-value: 5.0623e-17

Effect Size ( $\epsilon^2$ ) = 0.0447

LOO-CV Mean p-value: 5.2768e-17, Std Dev: 1.0547e-17

LOO-CV Mean Effect Size ( $\epsilon^2$ ): 0.0447, Std Dev: 0.0002

**Beneficial Parasitoid:**

Kruskal-Wallis test p-value: 4.4995e-02

Effect Size ( $\epsilon^2$ ) = 0.0173

LOO-CV Mean p-value: 4.5440e-02, Std Dev: 4.6976e-03

LOO-CV Mean Effect Size ( $\epsilon^2$ ): 0.0174, Std Dev: 0.0004

**c**

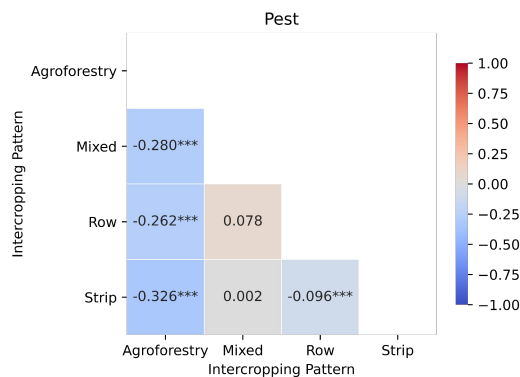

**Pest:**

Kruskal-Wallis test p-value: 8.1852e-13

Effect Size ( $\epsilon^2$ ) = 0.0146

LOO-CV Mean p-value: 8.3032e-13, Std Dev: 1.0724e-13

LOO-CV Mean Effect Size ( $\epsilon^2$ ): 0.0146, Std Dev: 0.0001

**Fig. S6| Statistical analysis of effect of spatial intercropping arrangements on insect functional groups.** Here ‘\*’ means 10% significance level, ‘\*\*’ means 5% significance level, ‘\*\*\*’ means 1% significance level.

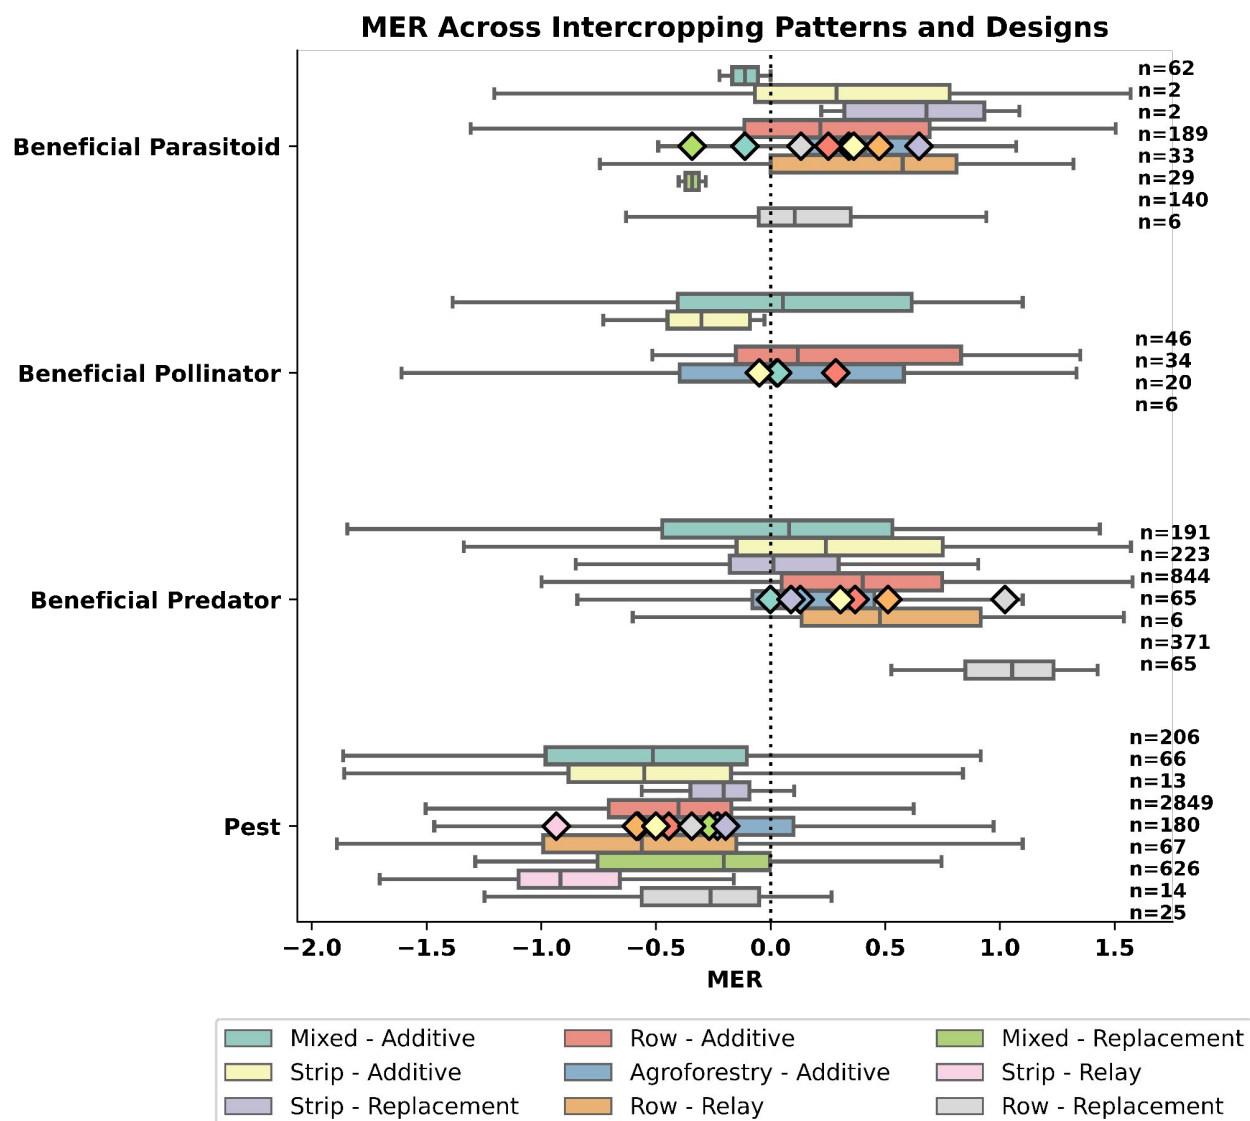

**Fig. S7| Effect of spatiotemporal intercropping configurations on different insect functional groups i.e. beneficial parasitoid, beneficial pollinator, beneficial predator and pest.**



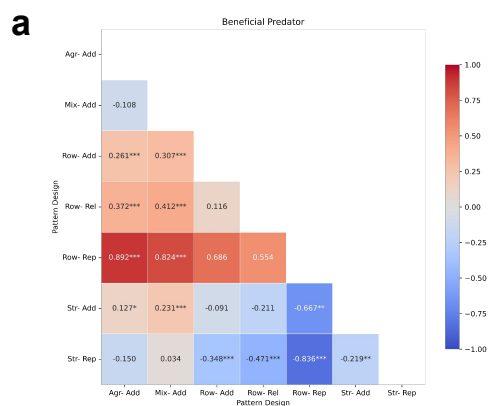

**Beneficial Pollinator:**

Kruskal-Wallis test p-value: 3.7302e-01

Effect Size ( $\epsilon^2$ ) = 0.0297

LOO-CV Mean p-value: 3.7630e-01, Std Dev: 4.9215e-02

LOO-CV Mean Effect Size ( $\epsilon^2$ ): 0.0300, Std Dev: 0.0036

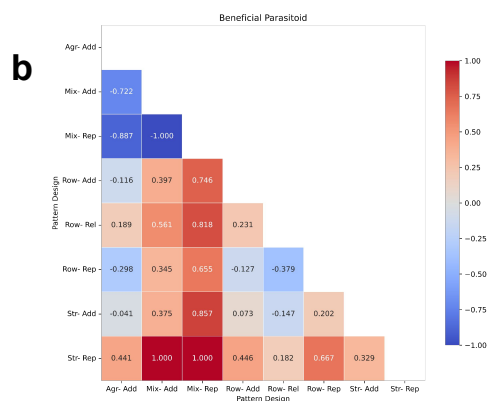

**Beneficial Predator:**

Kruskal-Wallis test p-value: 6.5842e-19

Effect Size ( $\epsilon^2$ ) = 0.0555

LOO-CV Mean p-value: 6.9043e-19, Std Dev: 1.4841e-19

LOO-CV Mean Effect Size ( $\epsilon^2$ ): 0.0555, Std Dev: 0.0002

**Beneficial Parasitoid:**

Kruskal-Wallis test p-value: 1.1655e-02

Effect Size ( $\epsilon^2$ ) = 0.0389

LOO-CV Mean p-value: 1.1872e-02, Std Dev: 1.5241e-03

LOO-CV Mean Effect Size ( $\epsilon^2$ ): 0.0390, Std Dev: 0.0007

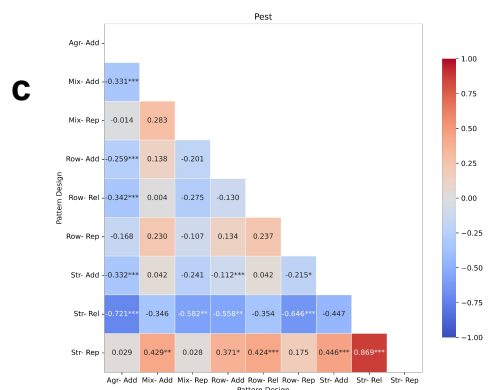

**Fig. S8| Statistical analysis of effect of spatiotemporal intercropping configurations on different insect functional groups i.e. beneficial parasitoid, beneficial pollinator, beneficial predator and pest. Here ‘\*’ means 10% significance level, ‘\*\*’ means 5% significance level, ‘\*\*\*’ means 1% significance level.**

a

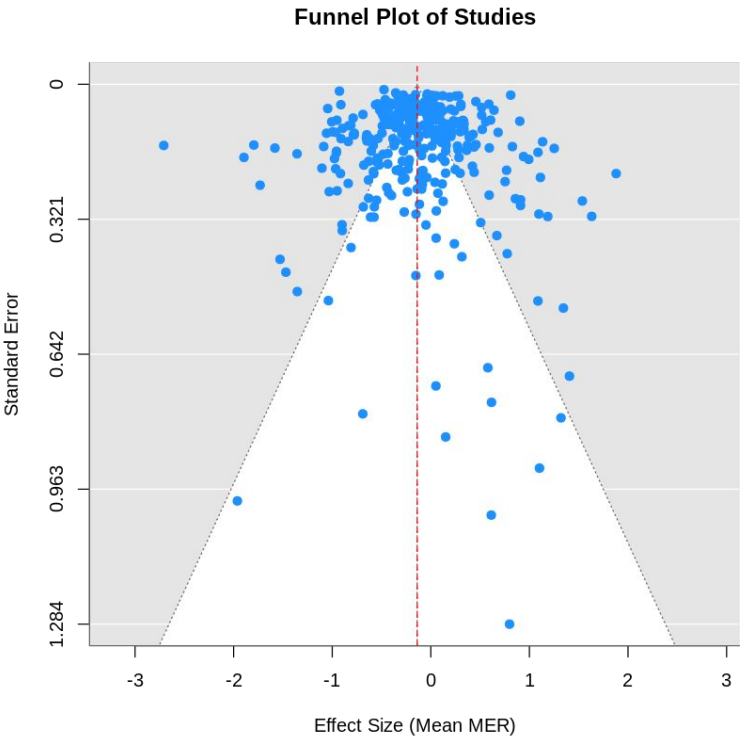

| Statistic | Value     |
|-----------|-----------|
| logLik    | -280.9108 |
| deviance  | 561.8215  |
| AIC       | 565.8215  |
| BIC       | 573.4258  |
| AICc      | 565.8581  |

| Measure  | Value                |         | Interpretation                                                |                    |                          |
|----------|----------------------|---------|---------------------------------------------------------------|--------------------|--------------------------|
| tau²     | 0.2650 (SE = 0.0228) |         | Estimated variance between studies (heterogeneity)            |                    |                          |
| tau      | 0.5147               |         | Square root of tau² (standard deviation of true effects)      |                    |                          |
| I²       | 98.25%               |         | Proportion of total variance due to heterogeneity (very high) |                    |                          |
| H²       | 57.07                |         | Ratio of total variability to sampling variability            |                    |                          |
| Estimate | SE                   | z-value | p-value                                                       | 95% CI             | Significance             |
| -0.1384  | 0.0299               | -4.625  | < .0001                                                       | [-0.1970, -0.0797] | *** (highly significant) |

**Fig. S9| Funnel plot assessing publication bias using Egger’s test.** Funnel plot displays effect sizes against their standard errors across studies. The dashed vertical line represents the pooled effect estimate.

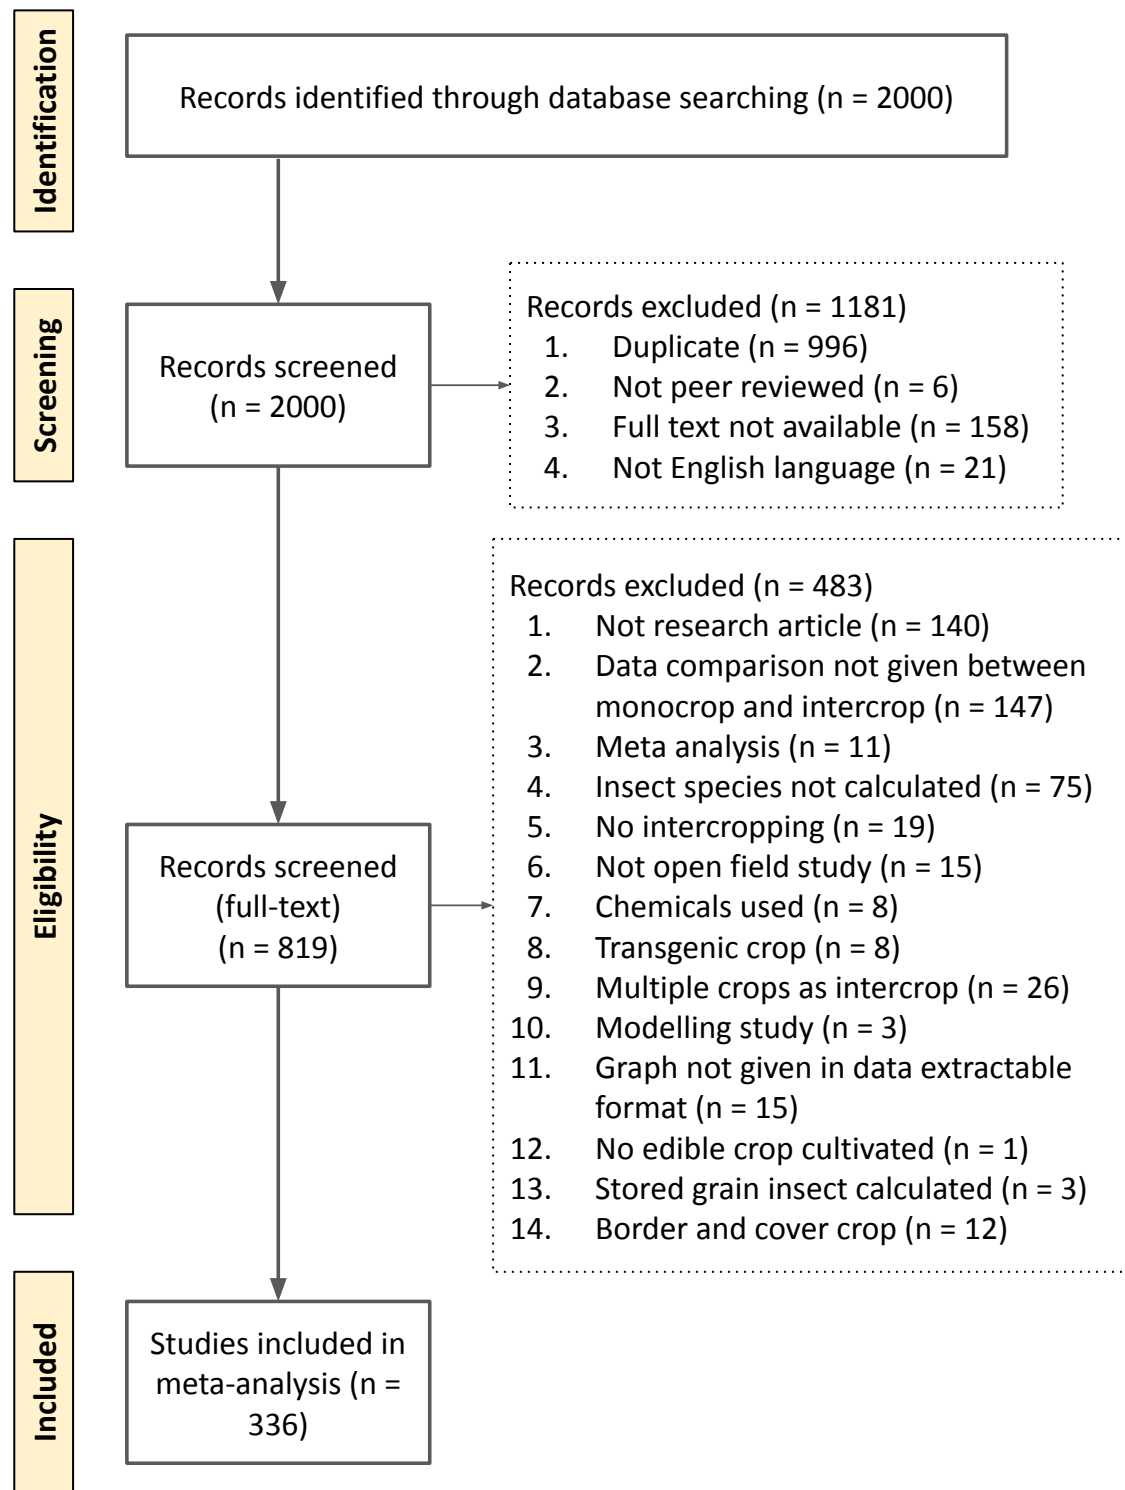

**Fig. S10| PRISMA flow diagram of study selection process.** Flow diagram outlining the identification, screening, eligibility, and inclusion of studies in accordance with PRISMA guidelines. 'n' is the number of studies excluded or included at each step.

| Insect_order   | Af   | Am   | As   | Aw   | BSh  | BSk  | BWh  | BWk  | Cfa  | Cfb  | Csa  | Csb   | Cwa  | Cwb  | Dfa  | Dfb  | Dfc  | Dsa  | Dsb  | Dwa  | ET   |
|----------------|------|------|------|------|------|------|------|------|------|------|------|-------|------|------|------|------|------|------|------|------|------|
| Araneae        | 2.7  | 0.0  | 0.0  | 0.0  | 0.0  | 2.4  | 0.0  | 0.0  | 0.0  | 0.0  | 0.0  | 0.0   | 0.0  | 0.0  | 0.0  | 0.0  | 0.0  | 3.8  | 0.0  | 0.0  | 0.0  |
| Blattodea      | 4.0  | 0.0  | 0.0  | 0.5  | 19.8 | 0.0  | 0.0  | 0.0  | 0.0  | 0.0  | 0.0  | 0.0   | 0.0  | 0.0  | 0.0  | 0.0  | 0.0  | 0.0  | 0.0  | 0.0  | 0.0  |
| Coleoptera     | 20.4 | 34.2 | 14.6 | 16.3 | 5.9  | 28.2 | 23.4 | 25.0 | 21.6 | 68.6 | 20.4 | 0.0   | 11.7 | 0.0  | 21.4 | 70.9 | 74.5 | 24.5 | 33.3 | 55.1 | 75.0 |
| Dermoptera     | 1.3  | 0.0  | 0.0  | 0.0  | 0.0  | 0.0  | 0.0  | 0.0  | 0.0  | 0.0  | 0.0  | 0.0   | 0.0  | 0.0  | 0.0  | 0.0  | 0.0  | 0.0  | 0.0  | 0.0  | 0.0  |
| Diptera        | 2.2  | 0.0  | 0.0  | 3.3  | 2.5  | 0.0  | 3.0  | 25.0 | 2.8  | 8.1  | 4.4  | 0.0   | 4.1  | 10.7 | 9.5  | 4.5  | 8.5  | 0.0  | 44.4 | 4.5  | 0.0  |
| Hemiptera      | 30.7 | 36.0 | 9.8  | 24.0 | 20.4 | 34.9 | 32.6 | 25.0 | 24.8 | 8.8  | 30.7 | 100.0 | 28.8 | 26.2 | 28.6 | 9.0  | 4.3  | 28.3 | 11.1 | 15.4 | 25.0 |
| Hymenoptera    | 4.9  | 5.6  | 37.8 | 6.1  | 7.3  | 12.5 | 0.5  | 0.0  | 37.0 | 5.1  | 4.4  | 0.0   | 20.0 | 35.7 | 40.5 | 2.2  | 8.5  | 9.4  | 0.0  | 10.3 | 0.0  |
| Lepidoptera    | 22.2 | 21.1 | 37.8 | 41.9 | 35.3 | 3.1  | 32.0 | 0.0  | 9.7  | 8.3  | 28.5 | 0.0   | 25.2 | 27.4 | 0.0  | 9.0  | 4.3  | 9.4  | 0.0  | 0.0  | 0.0  |
| Mantodea       | 1.3  | 0.0  | 0.0  | 0.0  | 0.0  | 0.0  | 0.0  | 0.0  | 0.0  | 0.0  | 0.0  | 0.0   | 0.0  | 0.0  | 0.0  | 0.0  | 0.0  | 0.0  | 0.0  | 0.0  | 0.0  |
| Mesostigmata   | 0.0  | 0.0  | 0.0  | 0.0  | 0.0  | 3.1  | 0.0  | 0.0  | 0.0  | 0.0  | 0.0  | 0.0   | 0.0  | 0.0  | 0.0  | 0.0  | 0.0  | 0.0  | 0.0  | 0.0  | 0.0  |
| Neuroptera     | 0.0  | 0.0  | 0.0  | 1.3  | 3.3  | 7.8  | 8.0  | 25.0 | 0.6  | 1.1  | 2.9  | 0.0   | 4.5  | 0.0  | 0.0  | 0.0  | 0.0  | 5.7  | 11.1 | 14.7 | 0.0  |
| Odonata        | 2.7  | 0.0  | 0.0  | 0.2  | 0.0  | 0.0  | 0.0  | 0.0  | 0.0  | 0.0  | 0.0  | 0.0   | 0.0  | 0.0  | 0.0  | 0.0  | 0.0  | 0.0  | 0.0  | 0.0  | 0.0  |
| Opiliones      | 0.0  | 0.0  | 0.0  | 0.0  | 0.0  | 0.0  | 0.0  | 0.0  | 0.0  | 0.0  | 0.0  | 0.0   | 0.0  | 0.0  | 0.0  | 0.0  | 0.0  | 1.9  | 0.0  | 0.0  | 0.0  |
| Orthoptera     | 4.9  | 0.0  | 0.0  | 0.0  | 0.7  | 0.0  | 0.0  | 0.0  | 0.0  | 0.0  | 4.4  | 0.0   | 4.5  | 0.0  | 0.0  | 0.0  | 0.0  | 0.0  | 0.0  | 0.0  | 0.0  |
| Thysanoptera   | 2.7  | 3.1  | 0.0  | 6.5  | 3.0  | 7.1  | 0.5  | 0.0  | 2.2  | 0.0  | 4.4  | 0.0   | 1.2  | 0.0  | 0.0  | 1.5  | 0.0  | 0.0  | 0.0  | 0.0  | 0.0  |
| Trombidiformes | 0.0  | 0.0  | 0.0  | 0.0  | 1.9  | 0.8  | 0.0  | 0.0  | 1.3  | 0.0  | 0.0  | 0.0   | 0.0  | 0.0  | 0.0  | 3.0  | 0.0  | 17.0 | 0.0  | 0.0  | 0.0  |

**Table S1| Percent distribution of insect orders by Köppen-Geiger climate zones.**

| <b>Continent</b> | <b>Weighted MER</b> | <b>MER for Beneficial</b> | <b>MER for Pest</b> |
|------------------|---------------------|---------------------------|---------------------|
| Europe           | -0.088              | 0.24                      | -0.758              |
| Africa           | -0.303              | 0.283                     | -0.490              |
| S. america       | 0.078               | 0.272                     | -0.291              |
| Asia             | -0.081              | 0.523                     | -0.52               |
| Oceania          | -0.011              | 0.641                     | -0.134              |
| N. america       | -0.275              | 0.307                     | -0.565              |

**Table S2| Continental variation in intercropping effects on insect-mediated services.**
